# Supplementary material for: Community-Associated MRSA Infection in Remote Amazon Basin Area, Peru
Source: PubMed Central journal article supplement (PMC4861527; doi:10.3201/eid2205.151881), 2016-05
Supplement: 15-1881-Techapp-s1.pdf [file 15-1881-Techapp-s1.pdf]

# Community-Associated MRSA Infection in Remote Amazon Basin Area, Peru

## Technical Appendix

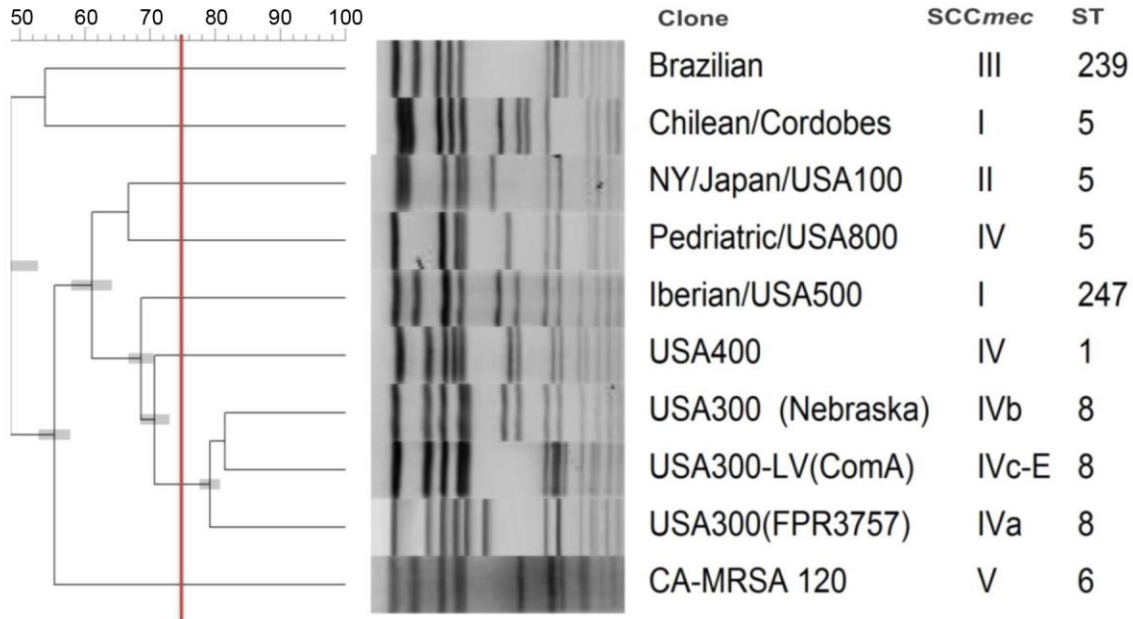

**Technical Appendix Figure.** Pulsed-field gel electrophoresis of known hospital-associated and community-associated methicillin-resistant *Staphylococcus aureus* (CA-MRSA) isolates from Latin America. Optimization 0.5, tolerance 1, cutoff 75%. SCC, staphylococcal cassette chromosome; ST, sequence type.
